# Supplementary material
Source: PubMed Central journal article supplement (PMC8566475)
Supplement: mmc1.pdf [file mmc1.pdf]

## Supplemental information

### **Lipid nanoparticles enhance the efficacy of mRNA and protein subunit vaccines by inducing robust T follicular helper cell and humoral responses**

**Mohamad-Gabriel Alameh, István Tombácz, Emily Bettini, Katlyn Lederer, Sonia Ndeupen, Chutamath Sittplangkoon, Joel R. Wilmore, Brian T. Gaudette, Ousamah Y. Soliman, Matthew Pine, Philip Hicks, Tomaz B. Manzoni, James J. Knox, John L. Johnson, Dorottya Laczkó, Hiromi Muramatsu, Benjamin Davis, Wenzhao Meng, Aaron M. Rosenfeld, Shirin Strohmeier, Paulo J.C. Lin, Barbara L. Mui, Ying K. Tam, Katalin Karikó, Alain Jacquet, Florian Krammer, Paul Bates, Michael P. Cancro, Drew Weissman, Eline T. Luning Prak, David Allman, Botond Z. Igyártó, Michela Locci, and Norbert Pardi**

## SUPPLEMENTAL FIGURES AND TABLES

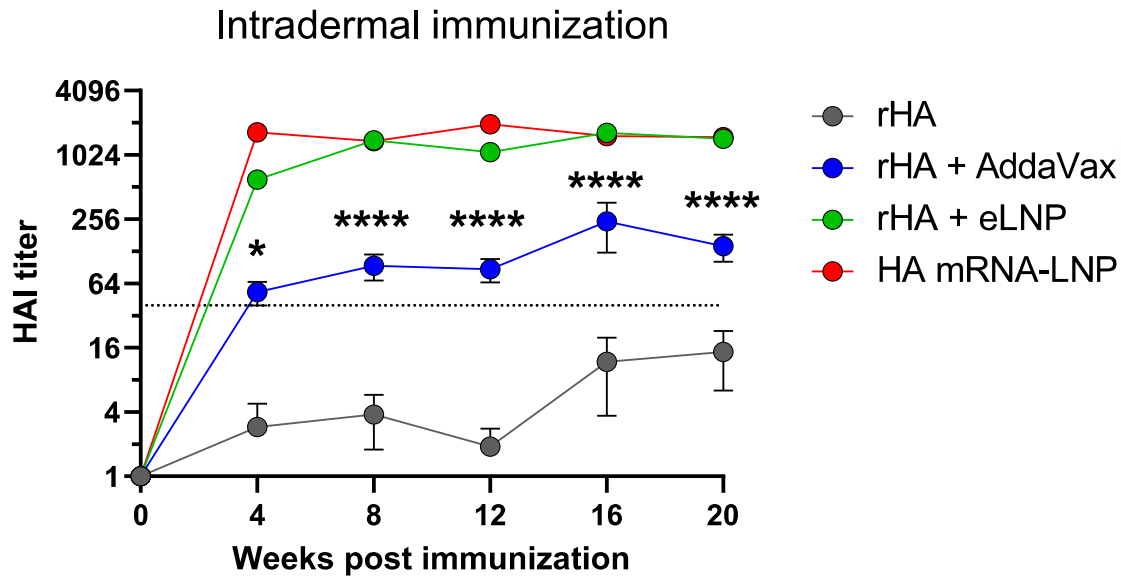

**Figure S1. Related to Figure 1. LNP-adjuvanted vaccines induce durable humoral immune responses.** (A) BALB/c mice received a single ID immunization with 10  $\mu$ g of rHA mixed with eLNP (equal amount of LNP as in 30  $\mu$ g mRNA-LNP) or AddaVax. Positive control animals received a single immunization with 10  $\mu$ g PR8 HA mRNA-LNP vaccine. PR8 HAI titers were followed for 20 weeks. n=10 mice/group. Symbols represent individual animals. The horizontal dotted line represents protective HAI value (1:40). Data are pooled from two independent experiments. Data shown are mean plus SEM. Statistical analysis: Two-way ANOVA with Bonferroni's multiple comparisons test; comparisons of AddaVax and eLNP groups are shown for each time point. \* $P \leq 0.05$ , \*\*\*\* $P \leq 0.0001$ .

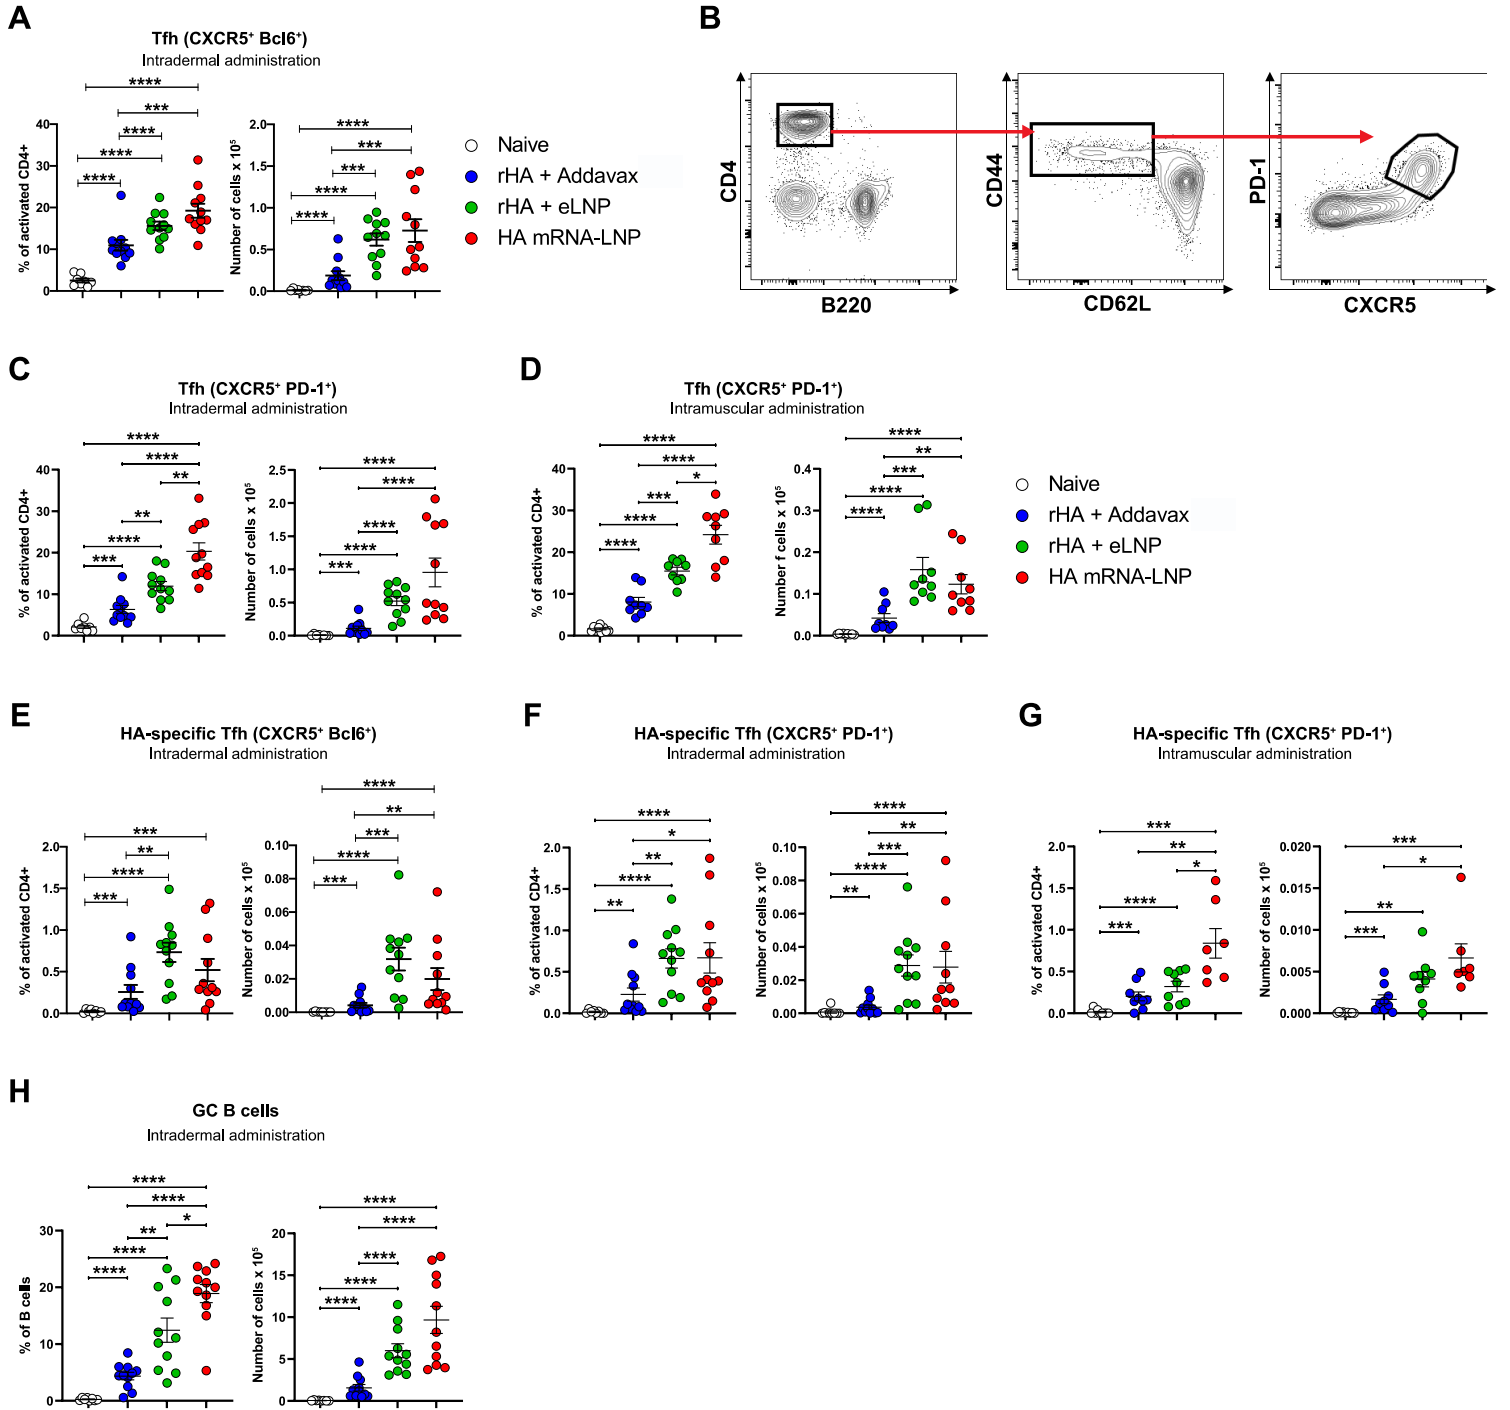

**Figure S2. Related to Figure 2. LNP-adjuvanted vaccines induce potent antigen-specific Tfh cell responses.** BALB/c mice received a single IM or ID immunization with 10  $\mu$ g of rHA mixed with eLNP or AddaVax. Positive control animals received a single immunization with 10  $\mu$ g PR8 HA mRNA-LNP vaccine. Twelve days later, Tfh and GC B cell responses were examined in draining lymph nodes. (A) Percentages and absolute numbers of Tfh cells (CD4<sup>+</sup>B220<sup>-</sup>CD44<sup>hi</sup>CD62L<sup>-</sup>Bcl6<sup>+</sup>CXCR5<sup>+</sup>) after ID immunization. (B) Gating strategy for an alternative Tfh cell definition as CD4<sup>+</sup>B220<sup>-</sup>CD44<sup>hi</sup>CD62L<sup>-</sup>PD-1<sup>+</sup>CXCR5<sup>+</sup> Tfh cells. (C-D) Percentages and numbers of Tfh cells (defined as in B) after ID (C) or IM (D) immunizations. (E) Percentages and numbers of HA-specific Tfh cells (CD4<sup>+</sup>B220<sup>-</sup>CD44<sup>hi</sup>CD62L<sup>-</sup>Bcl6<sup>+</sup>CXCR5<sup>+</sup>HA-MHCII tetramer<sup>+</sup>) after ID immunizations. (F-G) Percentages and numbers of HA-specific Tfh cells (CD4<sup>+</sup>B220<sup>-</sup>CD44<sup>hi</sup>CD62L<sup>-</sup>PD-1<sup>+</sup>CXCR5<sup>+</sup>HA-MHCII tetramer<sup>+</sup>) after ID (F) or IM (G) immunizations. (H) Percentages and numbers of GC B cells (CD4<sup>+</sup>/CD8<sup>-</sup>CD19<sup>+</sup>FAS<sup>+</sup>GL7<sup>+</sup>) after ID immunizations. In (A) and (C-H), symbols represent individual animals. Data are shown as mean plus SEM. Data are combined from three independent experiments. Statistical analysis: Unpaired two-tailed Mann-Whitney U test was conducted. \*  $P \leq 0.05$ , \*\*  $P \leq 0.01$ , \*\*\*  $P \leq 0.001$ , \*\*\*\*  $P \leq 0.0001$ .

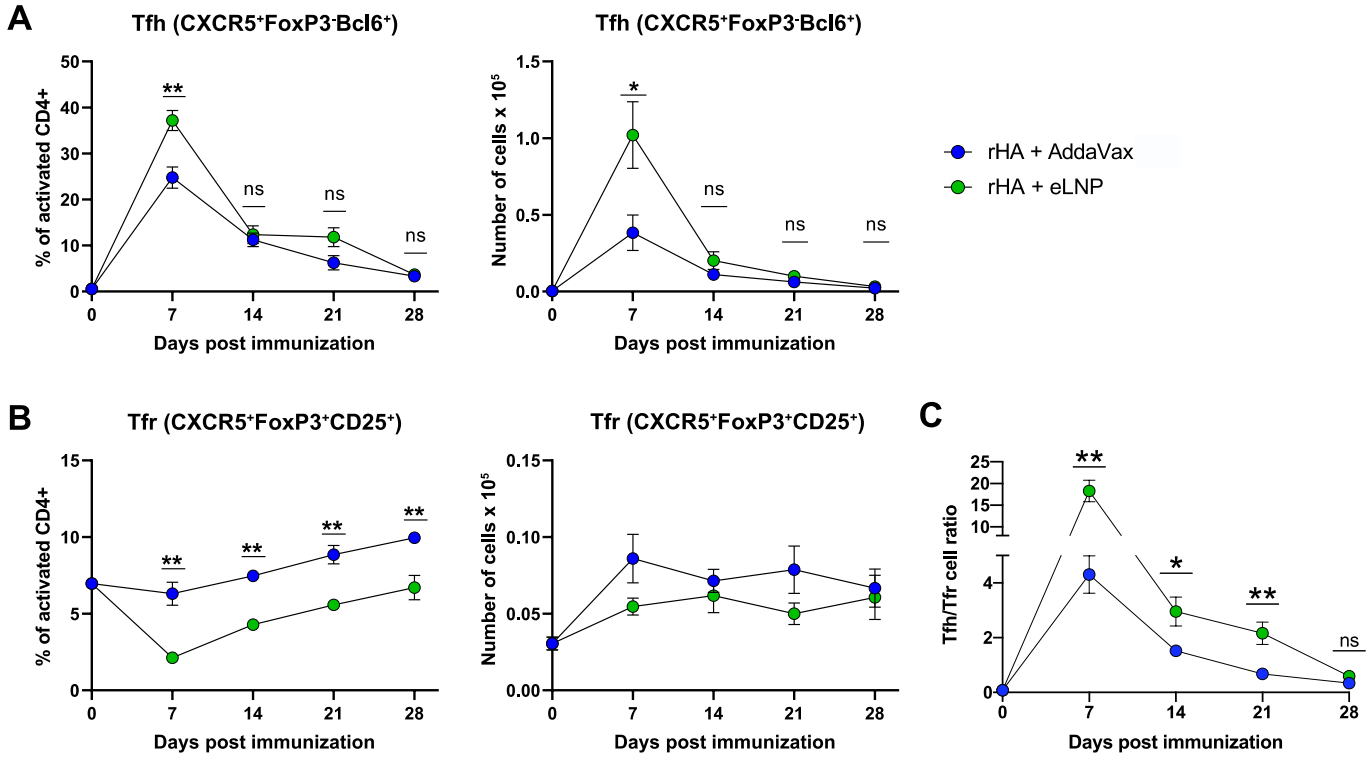

**Figure S3. Related to Figure 2. Perturbation of Tfh/Tfr cell ratio resolves by 28 days post immunization.** BALB/c mice received a single IM immunization with 10  $\mu$ g of rHA mixed with eLNP or AddaVax. At the timepoints indicated, Tfh and GC B cell responses were examined in draining lymph nodes by flow cytometry. (A) Kinetics of Tfh cell (B220-CD4<sup>+</sup>CD44<sup>hi</sup>CD62L-CXCR5<sup>+</sup>FoxP3<sup>+</sup>CD25<sup>+</sup>Bcl6<sup>+</sup>) frequency and absolute number. (B) Kinetics of Tfr cell (B220-CD4<sup>+</sup>CD44<sup>hi</sup>CD62L-CXCR5<sup>+</sup>FoxP3<sup>+</sup>CD25<sup>+</sup>) frequency and absolute number. (C) Kinetic of the Tfh/Tfr cell ratio. (A-C) n=6 mice/group. Data were combined from two independent experiments. Data shown are mean plus SEM. Statistical analysis: Unpaired two-tailed Mann-Whitney U test was conducted. \*  $P \leq 0.05$ , \*\*  $P \leq 0.01$ , \*\*\*  $P \leq 0.001$ , \*\*\*\*  $P \leq 0.0001$ .

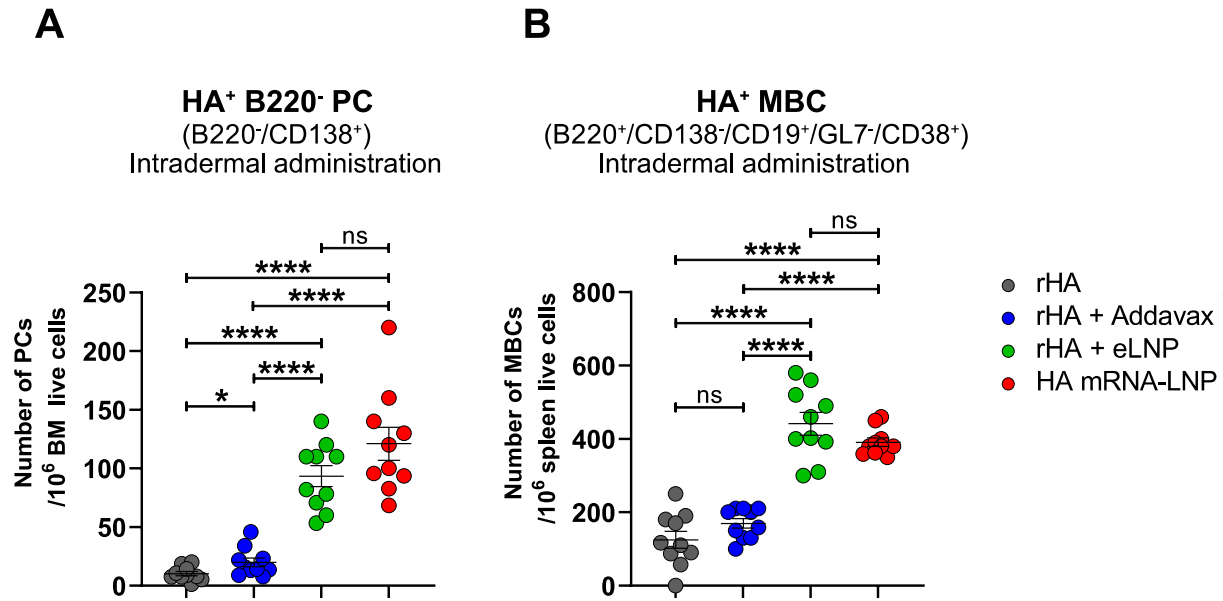

**Figure S4. Related to Figure 3. LNP-adjuvanted vaccines induce antigen-specific LLPC and MBC responses.** BALB/c mice received a single ID immunization with 10 µg of rHA mixed with eLNP or AddaVax. Positive control animals received a single immunization with PR8 HA mRNA-LNP vaccine. Twenty weeks later PR8 HA-specific (A) LLPC (IgD-Dump-B220<sup>-</sup>CD138<sup>+</sup>PR8 HA<sup>+</sup>) and (B) MBC (IgD-Dump-CD138<sup>-</sup>B220<sup>+</sup>CD19<sup>+</sup>CD38<sup>+</sup>GL7<sup>-</sup>PR8 HA<sup>+</sup>) responses were examined in bone marrow and spleen, respectively. n=8 mice/group. Symbols represent individual animals. Data shown are mean plus SEM. Data are pooled from two independent experiments. Statistical analysis: Unpaired two-tailed Mann-Whitney U test was conducted. \*P ≤ 0.05, \*\*\*\*P ≤ 0.0001.

**A**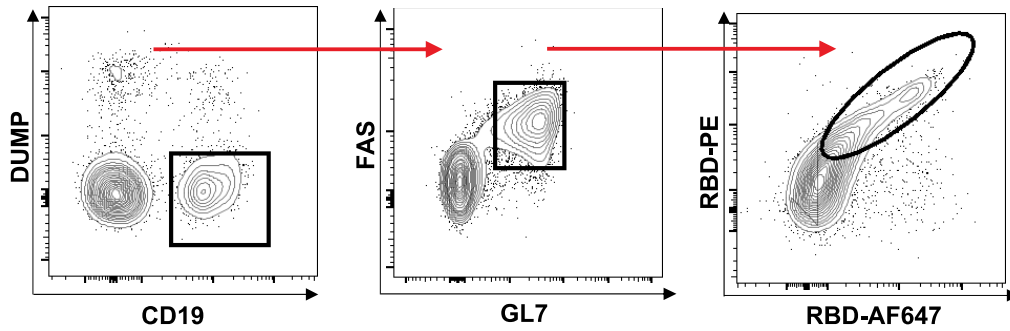**B**

**GC B cells**  
Intramuscular Immunization

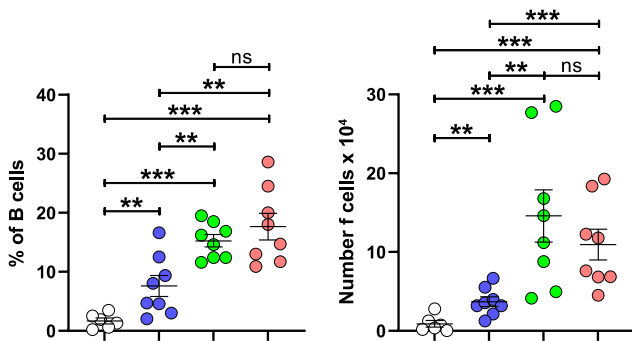**C**

**Tfh (CXCR5<sup>+</sup> PD-1<sup>+</sup>)**  
Intramuscular Immunization

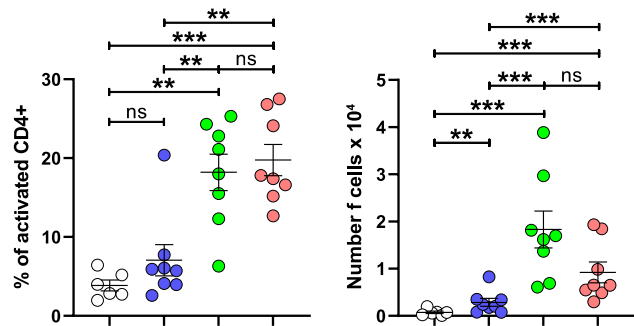

○ Naive  
● rRBD + Addavax  
● rRBD + eLNP  
● RBD mRNA-LNP

**Figure S5. Related to Figure 4. LNP-adjuvanted SARS-CoV-2 vaccines induce potent GC B and Tfh cell responses.** BALB/c mice received a single IM immunization with 10  $\mu$ g of rRBD mixed with eLNP or AddaVax. Positive control animals received a single immunization with 10  $\mu$ g of RBD mRNA-LNP. Twelve days later GC B and Tfh cell responses were examined in dLNs. (A) Gating strategy for defining RBD-specific GC B cells (CD4/CD8<sup>-</sup>CD19<sup>+</sup>FAS<sup>+</sup>GL7<sup>+</sup>RBD<sup>+</sup>). (B) Percentages and numbers of GC B cells (CD4/CD8<sup>-</sup>CD19<sup>+</sup>FAS<sup>+</sup>GL7<sup>+</sup>) after immunization. (C) Percentages and numbers of Tfh cells (CD4<sup>+</sup>B220<sup>-</sup>CD44<sup>hi</sup>CD62L<sup>-</sup>PD-1<sup>+</sup>CXCR5<sup>+</sup>) after immunization. n=8 mice/group. Symbols represent individual animals. (B-C) Data are shown as mean plus SEM. Data are pooled from three independent experiments. Statistical analysis: Unpaired two-tailed Mann-Whitney U test was conducted. \*  $P \leq 0.05$ , \*\*  $P \leq 0.01$ , \*\*\*  $P \leq 0.001$ , \*\*\*\*  $P \leq 0.0001$ .

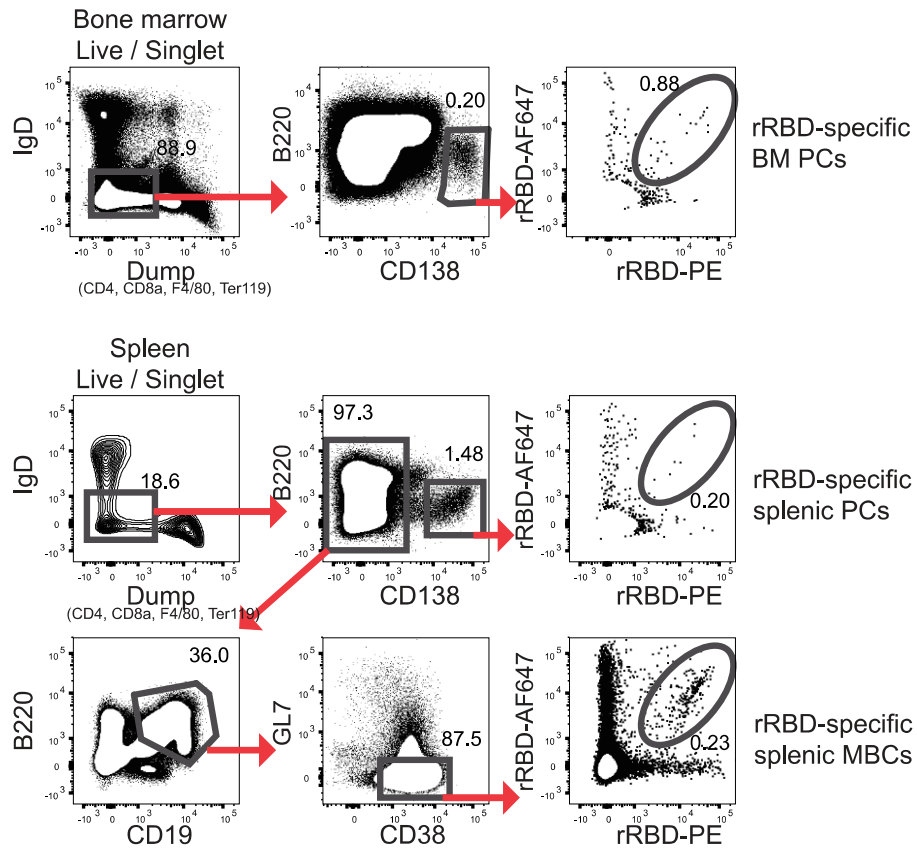

**Figure S6. Related to Figure 4. Gating strategy for measuring RBD-specific LLPC and MBC responses.** Representative gating strategy for antigen-specific LLPCs (IgD-Dump-B220-CD138<sup>+</sup>RBD<sup>+</sup>) in bone marrow and MBCs (IgD-Dump-CD138-B220<sup>+</sup>CD19<sup>+</sup>CD38<sup>+</sup>GL7-RBD<sup>+</sup>) in spleen.



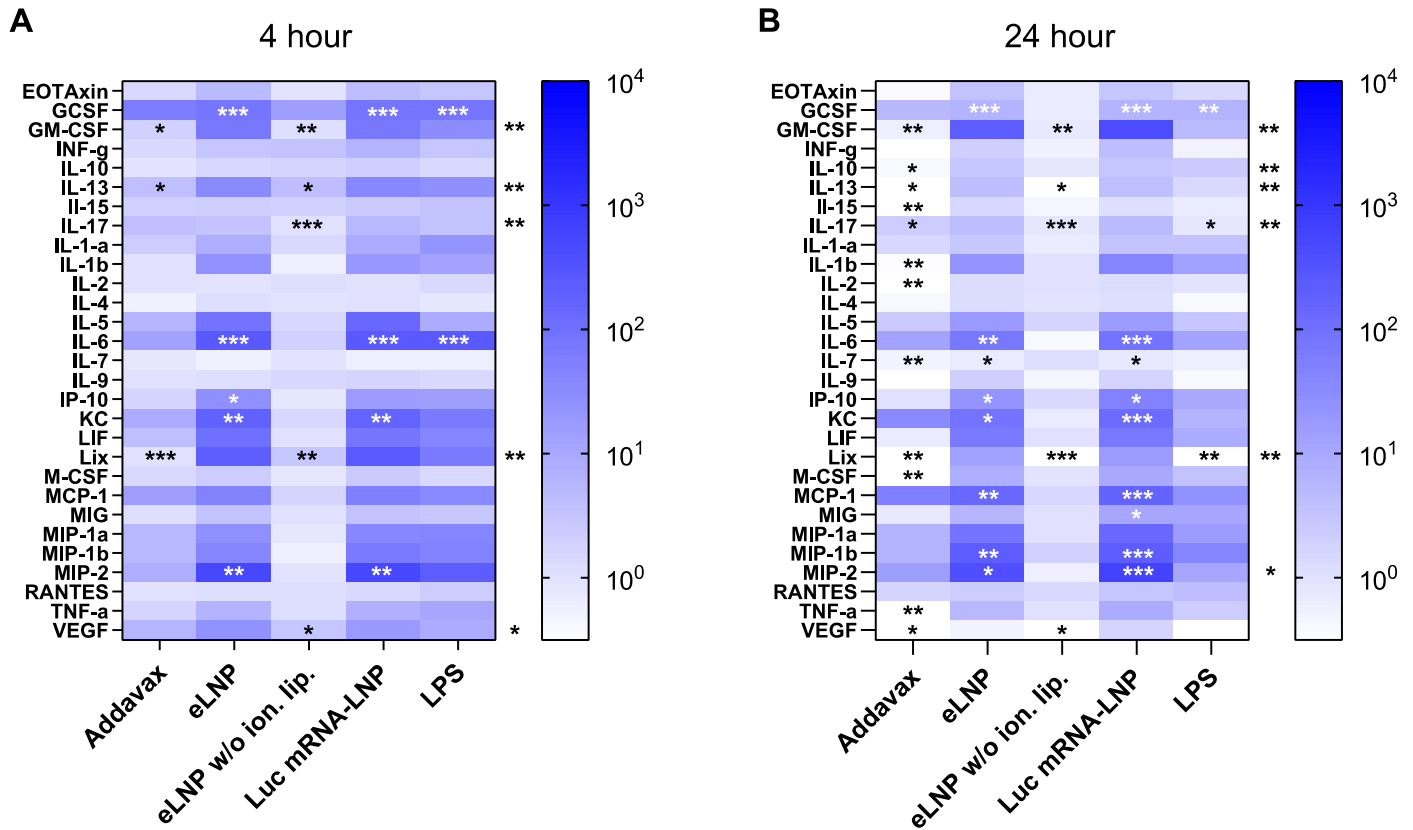

**Figure S7. Related to Figure 7. Cytokine and chemokine expression in adjuvant-injected mice.** BALB/c mice received a single ID immunization with 30  $\mu$ l of eLNPs with or without the ionizable lipid, 10  $\mu$ g of Luc mRNA-LNP or 30  $\mu$ l of AddaVax, and levels of selected cytokines were measured in dLN lysates with Luminex 4 or 24 hours later. Positive control animals received a single injection with LPS (1 mg/kg of body weight). (A, B) Heat map depicting cytokine expression as a ratio of the cytokine concentration in the adjuvant-treated groups to the cytokine concentration in the PBS control group at 4 hours (A) and 24 hours (B) post immunization. Three samples per group were measured, except 4h PBS, 24h LPS and 24h Addavax, where only two samples per group were analyzed. Asterisks mark the number of samples with readings above (white) or below (black) accurate signal detection range. Asterisks outside the heat map represent out of range values for the PBS control. Concentration values of the highest or lowest standard were used in these cases.

| Stain        | Fluorochrome | Clone     | Vendor           | Catalogue #  |
|--------------|--------------|-----------|------------------|--------------|
| Live/Dead    | -            | -         | Biologend        | 423101       |
| B220         | APC          | RA3-6B2   | Tonbo Biosci.    | 20-0452-U100 |
| IgM          | PerCP/F710   | II/41     | Invitrogen       | 46-5790-82   |
| CD19         | BV711        | 6D5       | Biologend        | 115555       |
| CD138        | BV421        | 281-2     | Biologend        | 142508       |
| CD4          | PE-Cy7       | GK1.5     | Biologend        | 100409       |
| CD8 $\alpha$ | PE-Cy7       | 53-6.7    | Biologend        | 100722       |
| Ter-199      | PE-Cy7       | Ter-199   | Biologend        | 116222       |
| F4/80        | PE-Cy7       | BM8       | Biologend        | 123114       |
| IgD          | APC-Cy7      | 11-26c.2a | Biologend        | 405716       |
| GL7          | AF488        | GL7       | Biologend        | 144612       |
| CD38         | AF700        | 90        | Invitrogen       | 56-0381-82   |
| rHA probe    | PE           | -         | Labeled in-house | See methods  |

| Stain        | Fluorochrome | Clone     | Vendor           | Catalogue # |
|--------------|--------------|-----------|------------------|-------------|
| Live/Dead    | -            | -         | Biologend        | 423101      |
| B220         | BUV496       | RA3-6B2   | BD Biosciences   | 612950      |
| IgM          | PerCP/F710   | II/41     | Invitrogen       | 46-5790-82  |
| CD19         | BV711        | 6D5       | Biologend        | 115555      |
| CD138        | BV421        | 281-2     | Biologend        | 142508      |
| CD4          | PE-Cy7       | GK1.5     | Biologend        | 100409      |
| CD8 $\alpha$ | PE-Cy7       | 53-6.7    | Biologend        | 100722      |
| Ter-199      | PE-Cy7       | Ter-199   | Biologend        | 116222      |
| F4/80        | PE-Cy7       | BM8       | Biologend        | 123114      |
| IgD          | APC-Cy7      | 11-26c.2a | Biologend        | 405716      |
| GL7          | AF488        | GL7       | Biologend        | 144612      |
| CD38         | AF700        | 90        | Invitrogen       | 56-0381-82  |
| rRBD probe   | PE           | -         | Labeled in-house | See methods |
| rRBD probe   | AF647        | -         | Labeled in-house | See methods |

**Table S1. Related to Figures 3, 4 and S6. LLPC and MBC panel for HA and RBD experiments.**

| Stain        | Fluorochrome | Clone     | Vendor           | Catalogue # |
|--------------|--------------|-----------|------------------|-------------|
| CD19         | BV785        | 6D5       | Biolegend        | 115543      |
| B220         | PE           | RA3-6B2   | Biolegend        | 103207      |
| CD4          | PE-Cy5       | H29.19    | Biolegend        | 130312      |
| CD8 $\alpha$ | PE-Cy5       | 53-6.7    | BD Biosciences   | 553034      |
| F4/80        | PE-Cy5       | BM8       | eBioScience      | 15-4801-82  |
| Gr-1         | PE-Cy5       | RB6-8C5   | Biolegend        | 108410      |
| IgD          | BV605        | 11-26c.2a | Biolegend        | 405727      |
| IgM          | PE-CF594     | R6-60.2   | BD Biosciences   | 562565      |
| rHA probe    | BV421        | -         | Labeled in-house | See methods |
| rHA probe    | AF647        | -         | Labeled in-house | See methods |

**Table S2. Related to Figure 3. B cell sorting panel.**

| Stain        | Fluorochrome | Clone   | Vendor         | Catalogue # |
|--------------|--------------|---------|----------------|-------------|
| CXCR5        | Biotin       | SPRCL5  | eBioscience    | 13-7185-82  |
| Streptavidin | BV421        | -       | BioLegend      | 405225      |
| B220         | BV650        | RA3-6B2 | BioLegend      | 103241      |
| CD4          | PerCP-Cy5.5  | RM4-5   | BioLegend      | 100540      |
| CD44         | FITC         | IM7     | eBioscience    | 11-0441-82  |
| CD62L        | BUV395       | MEL-14  | BD Biosciences | 740218      |
| PD-1         | PE-Cy7       | RMP1-30 | BioLegend      | 109110      |
| Bcl6         | AF647        | K112-91 | BD Biosciences | 624024      |
| Live/Dead    | eFluor 780   | -       | eBiosciences   | 65-0865-14  |
| Tetramer     | PE           | -       | -              | See methods |

**Table S3. Related to Figures 2, S2 and S4. Tfh panel**

| Stain        | Fluorochrome | Clone   | Vendor      | Catalogue # |
|--------------|--------------|---------|-------------|-------------|
| CXCR5        | Biotin       | SPRCL5  | eBioscience | 13-7185-82  |
| Streptavidin | BV421        | -       | BioLegend   | 405225      |
| B220         | BV650        | RA3-6B2 | BioLegend   | 103241      |
| CD4          | PerCP-Cy5.5  | RM4-5   | BioLegend   | 100540      |
| CD44         | BV605        | IM7     | BioLegend   | 103047      |
| CD62L        | BUV395       | MEL-14  | BD          | 740218      |
| PD-1         | PE           | RMP1-30 | BioLegend   | 109104      |
| Bcl6         | AF647        | K112-91 | BD          | 624024      |
| Live/Dead    | eFluor 780   | -       | eBioscience | 65-0865-14  |

**Table S4 related to Figures 6 and 7. Tfh panel**

| Stain        | Fluorochrome | Clone   | Vendor         | Catalogue # |
|--------------|--------------|---------|----------------|-------------|
| CXCR5        | Biotin       | SPRCL5  | eBioscience    | 13-7185-82  |
| Streptavidin | BV421        | -       | BioLegend      | 405225      |
| B220         | BV650        | RA3-6B2 | BioLegend      | 103241      |
| CD4          | PerCP-Cy5.5  | RM4-5   | BioLegend      | 100540      |
| CD44         | BV605        | IM7     | BioLegend      | 103047      |
| CD62L        | BUV395       | MEL-14  | BD Biosciences | 740218      |
| PD-1         | PE           | RMP1-30 | BioLegend      | 109104      |
| CD25         | AF488        | PC61.5  | eBioscience    | 53-0251-82  |
| Bcl6         | AF647        | K112-91 | BD Biosciences | 624024      |
| FoxP3        | PE-Cy7       | FJK-16s | eBioscience    | 25-2773-82  |
| Live/Dead    | eFluor 780   | -       | eBioscience    | 65-0865-14  |

**Table S5 related to Figure S3. Tfr panel**

| Stain         | Fluorochrome | Clone     | Vendor           | Catalogue # |
|---------------|--------------|-----------|------------------|-------------|
| CD138         | Biotin       | 281-2     | BD Biosciences   | 553713      |
| Streptavidin  | BV650        | -         | BioLegend        | 405232      |
| CD3e          | BUV395       | 145-2c11  | BD Biosciences   | 563565      |
| CD19          | BV605        | 6D5       | BioLegend        | 115540      |
| GL7           | PerCP-Cy5.5  | GL7       | BioLegend        | 144610      |
| FAS           | PE           | Jo2       | BD Biosciences   | 554258      |
| IgD           | PE-Cy7       | 11-26c.2a | BioLegend        | 405720      |
| HA Tetramer 1 | AF488        | -         | Labeled in-house | See methods |
| HA Tetramer 2 | AF647        | -         | Labeled in-house | See methods |
| RBD Tetramer  | BV421        | -         | Labeled in-house | See methods |
| Live/Dead     | eFluor 780   | -         | eBioscience      | 65-0865-14  |

**Table S6 related to Figures 6 and 7. GC B cell panel**

| Stain        | Fluorochrome | Clone   | Vendor           | Catalogue # |
|--------------|--------------|---------|------------------|-------------|
| CD138        | Biotin       | 281-2   | BD Biosciences   | 553713      |
| Streptavidin | BV650        | -       | BioLegend        | 405232      |
| CD4          | PerCP-Cy5.5  | RM4-5   | BioLegend        | 100540      |
| CD8a         | PerCP-Cy5.5  | 53-6.7  | BioLegend        | 100734      |
| CD19         | PE-Cy7       | eBio1D3 | eBioscience      | 25-0193-82  |
| GL7          | eFluor 660   | GL7     | eBioscience      | 50-5902-82  |
| FAS          | PE           | Jo2     | BD Biosciences   | 554258      |
| IgD          | eFluor 450   | 11-26c  | eBioscience      | 48-5993-82  |
| HA Probe 1   | AF488        | -       | Labeled in-house | See methods |
| HA Probe 2   | AF647        | -       | Labeled in-house | See methods |
| RBD Probe    | BV421        | -       | Labeled in-house | See methods |
| Live/Dead    | eFluor 780   | -       | eBioscience      | 65-0865-14  |

**Table S7 related to Figures 2, S2 and S4. GC B cell panel**
